# Supplementary material for: Diacylglycerol Lipase α Knockout Mice Demonstrate Metabolic and Behavioral Phenotypes Similar to Those of Cannabinoid Receptor 1 Knockout Mice
Source: PubMed Central journal article supplement (PMC4451644; doi:10.3389/fendo.2015.00086), 2015-06-02
Supplement: datasheet_1.pdf [file datasheet_1.pdf]

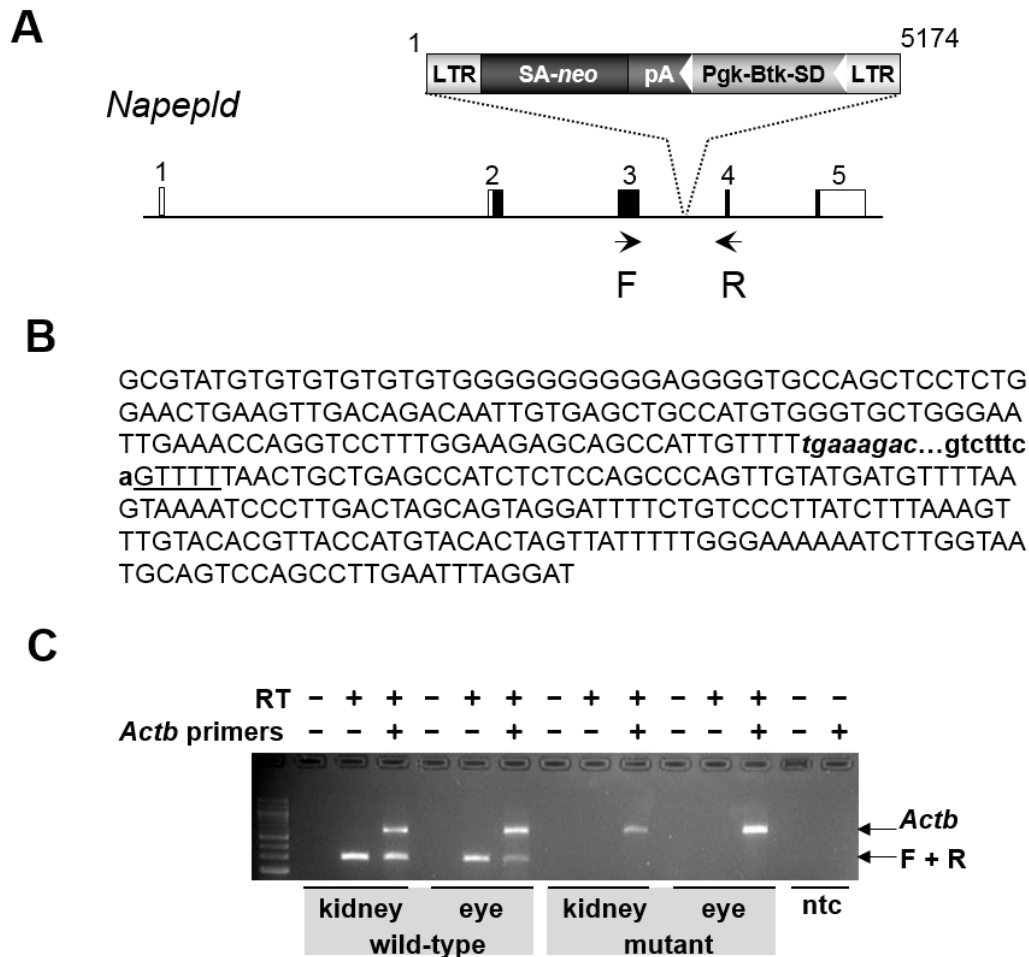

**Figure S1. Generation of *Napepld* KO mice.** **A)** Schematic diagram of the *Napepld* gene showing the location of retroviral gene-trap vector insertion in Omnibank embryonic stem (ES) cell clone OST429065 (accession CG656460.1). This clone was generated using vector VICTR48 (accession EU676804.1) which disrupts endogenous gene transcription through the action of a splice acceptor (SA-*neo*) cassette. Open boxes denote untranslated exons, filled boxes denote coding exons. LTR, viral long terminal repeat; SA, splice acceptor sequence; *neo*, neomycin phosphotransferase genes; pA, polyadenylation sequence; *Pgk*, phosphoglycerate kinase-1 promoter; *Btk*-SD, Bruton's tyrosine kinase splice donor sequence. Oligonucleotide primers (F and R) used to assess the efficiency of transcript capture are depicted with arrowheads. **B)** Mouse genomic sequence obtained by inverse PCR amplification of the proviral insertion site. Vector sequence is shown in lower case **bold** text, and is abbreviated. A five-base duplication of genomic sequence was observed at site of insertion, and is underlined. **C)** RT-PCR expression analysis of *Napepld* transcript. Endogenous *Napepld* transcript was detected in the kidney and eye of wild-type (+/+) mice but not in homozygous mutant (-/-) tissues. Primers F: 5'-CGTCTTCACGCCTTCCCAGCACT-3' and R: 5'-GAATCGCCACAGATCTCTTTGTTT GA-3' are complementary to *Napepld* exons 3 and 4, respectively, and amplify a product of 290 nucleotides. RT-PCR analysis using primers (*Actb*) complimentary to the mouse *beta actin* gene (accession number M12481) was performed in the same reaction as an internal amplification control. Lanes labeled "ntc" represent control reactions containing no template.

**Table S1. Body composition of *Dagla* KO and WT mice by QMR at 16 weeks of age**

| <b>Cohort</b> | <b>Genotype</b> | <b>N</b> | <b>Diet</b> | <b>Body weight (g)</b> | <b>Body fat (g)</b> | <b>% Body fat</b> | <b>LBM (g)</b> |
|---------------|-----------------|----------|-------------|------------------------|---------------------|-------------------|----------------|
| 1-M           | WT              | 16       | Chow        | 31.3 ± 2.8             | 4.4 ± 1.7           | 13.9 ± 4.6        | 26.9 ± 2.1     |
| 1-M           | KO              | 8        | Chow        | 26.5 ± 1.7***          | 2.9 ± 1.0*          | 11.1 ± 4.2        | 23.6 ± 2.4**   |
| 1-F           | WT              | 16       | Chow        | 23.3 ± 2.4             | 4.0 ± 1.4           | 17.0 ± 5.0        | 19.3 ± 1.8     |
| 1-F           | KO              | 9        | Chow        | 20.2 ± 1.4**           | 2.5 ± 0.9**         | 12.2 ± 3.7*       | 17.7 ± 0.9*    |
| 2-M           | WT              | 18       | HFD         | 39.7 ± 5.2             | 11.8 ± 3.6          | 29.2 ± 5.6        | 27.9 ± 2.1     |
| 2-M           | KO              | 9        | HFD         | 32.5 ± 5.0**           | 7.9 ± 4.0*          | 23.2 ± 7.9*       | 24.6 ± 1.4***  |
| 2-F           | WT              | 9        | HFD         | 27.6 ± 3.7             | 8.7 ± 3.0           | 30.8 ± 7.0        | 18.9 ± 1.6     |
| 2-F           | KO              | 11       | HFD         | 22.2 ± 1.5***          | 4.0 ± 1.0***        | 17.9 ± 4.0***     | 18.2 ± 1.2     |
| 3-M           | WT              | 13       | HFD         | 38.8 ± 4.7             | 10.1 ± 3.5          | 25.6 ± 6.9        | 28.7 ± 2.8     |
| 3-M           | KO              | 10       | HFD         | 28.3 ± 3.6***          | 4.6 ± 2.7***        | 15.7 ± 7.5**      | 23.6 ± 1.8***  |
| 3-F           | WT              | 11       | HFD         | 26.9 ± 3.2             | 8.2 ± 2.6           | 30.1 ± 6.5        | 18.7 ± 1.3     |
| 3-F           | KO              | 10       | HFD         | 20.0 ± 3.3***          | 4.0 ± 1.9***        | 19.5 ± 5.9***     | 16.0 ± 2.0**   |
| 5-M           | WT              | 15       | HFD         | 39.7 ± 7.4             | 8.4 ± 4.5           | 20.1 ± 7.0        | 31.3 ± 3.3     |
| 5-M           | KO              | 13       | HFD         | 29.8 ± 3.3***          | 3.1 ± 0.5***        | 10.5 ± 1.7***     | 26.7 ± 3.2***  |
| 5-F           | WT              | 12       | HFD         | 29.0 ± 3.0             | 6.7 ± 2.4           | 22.6 ± 6.1        | 22.3 ± 0.9     |
| 5-F           | KO              | 8        | HFD         | 24.6 ± 1.7**           | 3.9 ± 0.9**         | 15.8 ± 3.1**      | 20.7 ± 1.2**   |
| 6-M           | WT              | 14       | HFD         | 34.8 ± 4.1             | 9.8 ± 2.7           | 28.4 ± 7.5        | 25.0 ± 4.2     |
| 6-M           | KO              | 12       | HFD         | 27.6 ± 2.6***          | 4.6 ± 1.0***        | 16.6 ± 3.0***     | 23.0 ± 2.2     |
| 6-F           | WT              | 16       | HFD         | 29.8 ± 4.2             | 8.9 ± 0.3           | 29.1 ± 6.8        | 20.9 ± 1.7     |
| 6-F           | KO              | 15       | HFD         | 23.7 ± 2.8***          | 5.0 ± 1.6***        | 20.8 ± 4.3***     | 18.7 ± 1.8**   |
| 7-M           | WT              | 6        | HFD         | 47.8 ± 7.0             | 15.5 ± 4.1          | 31.9 ± 5.2        | 32.4 ± 3.9     |
| 7-M           | KO              | 10       | HFD         | 33.1 ± 4.3***          | 6.8 ± 3.0***        | 20.0 ± 6.4**      | 26.2 ± 1.7***  |
| 7-F           | WT              | 15       | HFD         | 30.1 ± 5.5             | 9.3 ± 3.9           | 29.8 ± 9.3        | 20.9 ± 2.8     |
| 7-F           | KO              | 8        | HFD         | 23.3 ± 3.1**           | 4.7 ± 2.0**         | 19.4 ± 6.0*       | 18.6 ± 1.5     |
| 8-F           | WT              | 8        | Chow        | 24.0 ± 2.5             | 4.3 ± 1.0           | 17.6 ± 3.0        | 19.7 ± 1.7     |
| 8-F           | KO              | 8        | Chow        | 20.6 ± 2.3*            | 2.9 ± 0.7*          | 14.3 ± 2.8*       | 17.6 ± 1.9*    |

Data presented as mean ± SD; N = number of mice; M = Male, F = female; LBM, lean body mass.  
KO different from WT, \* $P < 0.05$ ; \*\*  $P < 0.01$ ; \*\*\*  $P < 0.001$ .

**Table S2. Body composition by DEXA of *Dagla* KO and WT mice aged 29 weeks**

| <u>Cohort</u> | <u>Genotype</u> | <u>N</u> | <u>Diet</u> | <u>Body weight (g)</u> | <u>% Body fat</u> | <u>LBM (g)</u> | <u>BMD (mg/cm<sup>2</sup>)</u> |
|---------------|-----------------|----------|-------------|------------------------|-------------------|----------------|--------------------------------|
| 3-M           | WT              | 13       | HFD         | 47.4 ± 6.5             | 35.0 ± 7.2        | 30.0 ± 3.0     | 0.060 ± 0.003                  |
| 3-M           | KO              | 10       | HFD         | 32.0 ± 6.0***          | 22.6 ± 8.3**      | 23.2 ± 2.0***  | 0.055 ± 0.003**                |
| 3-F           | WT              | 11       | HFD         | 34.0 ± 8.6             | 36.4 ± 13.5       | 20.4 ± 1.9     | 0.053 ± 0.003                  |
| 3-F           | KO              | 9        | HFD         | 23.2 ± 4.8**           | 25.3 ± 8.4*       | 16.4 ± 1.8***  | 0.048 ± 0.004**                |

Data presented as mean ± SD; N = number of mice; M = Male, F = female; LBM, lean body mass; BMD, bone mineral density. KO different from WT, \* $P < 0.05$ ; \*\*  $P < 0.01$ ; \*\*\* $P < 0.001$ .

**Table S3. Body composition by QMR of adult *Cnr1* KO and WT mice**

| <b>Cohort</b> | <b>Genotype</b> | <b>Age (wks)</b> | <b>N</b> | <b>Diet</b> | <b>Body weight (g)</b> | <b>Body fat (g)</b> | <b>% Body fat</b> | <b>LBM (g)</b> |
|---------------|-----------------|------------------|----------|-------------|------------------------|---------------------|-------------------|----------------|
| 1-M           | WT              | 16               | 15       | HFD         | 37.5 ± 4.2             | 12.0 ± 3.6          | 31.6 ± 7.4        | 25.5 ± 2.6     |
| 1-M           | KO              | 16               | 14       | HFD         | 30.8 ± 3.7***          | 6.7 ± 2.5***        | 21.1 ± 5.3***     | 24.1 ± 1.5     |
| 1-F           | WT              | 16               | 11       | HFD         | 25.0 ± 2.5             | 7.0 ± 2.6           | 27.6 ± 8.1        | 18.0 ± 1.3     |
| 1-F           | KO              | 16               | 10       | HFD         | 23.0 ± 3.0             | 5.2 ± 2.0           | 22.1 ± 5.8        | 17.8 ± 1.5     |
| 2-F           | WT              | 16               | 14       | Chow        | 26.7 ± 4.4             | 5.1 ± 2.8           | 18.2 ± 6.1        | 21.6 ± 1.8     |
| 2-F           | KO              | 16               | 9        | Chow        | 22.4 ± 1.6*            | 2.9 ± 0.4*          | 12.8 ± 1.8*       | 19.5 ± 1.4**   |
| 3-M           | WT              | 32               | 15       | HFD         | 48.6 ± 7.1             | 15.8 ± 4            | 32.1 ± 5.5        | 32.8 ± 4.1     |
| 3-M           | KO              | 32               | 9        | HFD         | 32.8 ± 3.1***          | 6.5 ± 2.1***        | 19.8 ± 5.5***     | 26.2 ± 2.6***  |
| 3-F           | WT              | 32               | 11       | HFD         | 36.2 ± 5               | 12.9 ± 3.3          | 35.1 ± 4.6        | 23.3 ± 1.9     |
| 3-F           | KO              | 32               | 7        | HFD         | 28.8 ± 5.8*            | 6.2 ± 3.2***        | 20.7 ± 5.8***     | 22.6 ± 2.9     |
| 5-M           | WT              | 16               | 8        | HFD         | 32.7 ± 4.1             | 8.4 ± 2.7           | 25.3 ± 5.6        | 24.2 ± 2.0     |
| 5-M           | KO              | 16               | 8        | HFD         | 26.7 ± 3.4*            | 5.0 ± 1.8*          | 18.4 ± 4.0*       | 21.6 ± 1.8*    |
| 6-F           | WT              | 21               | 8        | Chow        | 26.3 ± 3.1             | 5.8 ± 2.3           | 21.5 ± 6.1        | 20.5 ± 1.3     |
| 6-F           | KO              | 21               | 7        | Chow        | 22.6 ± 2.0*            | 3.2 ± 0.5*          | 14.0 ± 2.3**      | 19.4 ± 2.0     |
| 7-M           | WT              | 28               | 7        | Chow        | 37.8 ± 5.3             | 7.7 ± 4.0           | 19.7 ± 7.6        | 30.1 ± 1.9     |
| 7-M           | KO              | 28               | 7        | Chow        | 28.4 ± 3.4**           | 3.1 ± 0.8*          | 10.7 ± 2.1*       | 25.4 ± 2.9**   |
| 7-F           | WT              | 28               | 13       | Chow        | 26.5 ± 5.6             | 5.8 ± 4.3           | 20.2 ± 9.4        | 20.7 ± 1.9     |
| 7-F           | KO              | 28               | 9        | Chow        | 24.0 ± 2.9             | 3.5 ± 0.8           | 14.5 ± 2.1        | 20.5 ± 2.2     |

Data presented as mean ± SD; N, number of mice; wks, weeks; M, male; F, female; LBM, lean body mass. KO different from WT, \* $P < 0.05$ ; \*\*  $P < 0.01$ ; \*\*\* $P < 0.001$ .

**Table S4. Serum triglyceride and total cholesterol levels in *Dagla* and *Cnr1* KO mice**

| <u>Cohort</u> | <u>Genotype</u> | <u>Age</u> | <u>N</u> | <u>Diet</u> | <u>TG (mg/dL)</u> | <u>Chol (mg/dL)</u> |
|---------------|-----------------|------------|----------|-------------|-------------------|---------------------|
| 3-M           | <i>Dagla</i> WT | 15 mo      | 10       | HFD         | 107.6 ± 44.0      | 250.8 ± 111.5       |
| 3-M           | <i>Dagla</i> KO | 15 mo      | 8        | HFD         | 84.5 ± 41.7       | 147.0 ± 32.1*       |
| 3-F           | <i>Dagla</i> WT | 16 mo      | 9        | HFD         | 100.1 ± 21.2      | 107.4 ± 33.2        |
| 3-F           | <i>Dagla</i> KO | 16 mo      | 6        | HFD         | 87.3 ± 44.1       | 108.5 ± 26.5        |
| 4-M           | <i>Dagla</i> WT | 10 mo      | 12       | HFD         | 109.3 ± 34.7      | 157.8 ± 42.1        |
| 4-M           | <i>Dagla</i> KO | 10 mo      | 5        | HFD         | 71.8 ± 25.3*      | 158.6 ± 18.2        |
| 4-F           | <i>Dagla</i> WT | 9 mo       | 13       | HFD         | 100.5 ± 25.7      | 131.9 ± 29.8        |
| 4-F           | <i>Dagla</i> KO | 9 mo       | 7        | HFD         | 82.6 ± 21.2       | 118.3 ± 24.0        |
| 5-M           | <i>Dagla</i> WT | 4 mo       | 15       | HFD         | 156.2 ± 46        | 150.6 ± 31.5        |
| 5-M           | <i>Dagla</i> KO | 4 mo       | 13       | HFD         | 112.0 ± 24.7**    | 132.5 ± 30.0        |
| 5-F           | <i>Dagla</i> WT | 5 mo       | 12       | HFD         | 129.5 ± 22        | 133.8 ± 30.4        |
| 5-F           | <i>Dagla</i> KO | 5 mo       | 8        | HFD         | 88.9 ± 15.6***    | 121.5 ± 23.3        |
| 1-M           | <i>Cnr1</i> WT  | 5 mo       | 15       | HFD         | 196.3 ± 48.7      | 242.3 ± 82.5        |
| 1-M           | <i>Cnr1</i> KO  | 5 mo       | 12       | HFD         | 114.8 ± 51.1***   | 190.1 ± 38.0        |
| 1-F           | <i>Cnr1</i> WT  | 5 mo       | 11       | HFD         | 81.7 ± 13.7       | 167.8 ± 32.6        |
| 1-F           | <i>Cnr1</i> KO  | 5 mo       | 9        | HFD         | 75.2 ± 21.5       | 137.4 ± 26.1*       |

Data presented as mean ± SD; N = number of mice; TG, triglyceride; Chol, total cholesterol  
KO different from WT, \* $P < 0.05$ ; \*\*  $P < 0.01$ ; \*\*\* $P < 0.001$ .
